# Supplementary material for: A new simple, highly sensitive and selective spectrofluorimetric method for the speciation of thallium at pico-trace levels in various complex matrices usingN-(pyridin-2-yl)-quinoline-2-carbothioamide
Source: Royal Society of Chemistry journal article supplement (doi:10.1039/d1ra05388d), 2021-01-01
Supplement: d1ra05388d1.pdf [file d1ra05388d1.pdf]

## The Supplementary Information Section of Manuscript RA- ART-07-2021-5388 of Lajin for RSC Advances

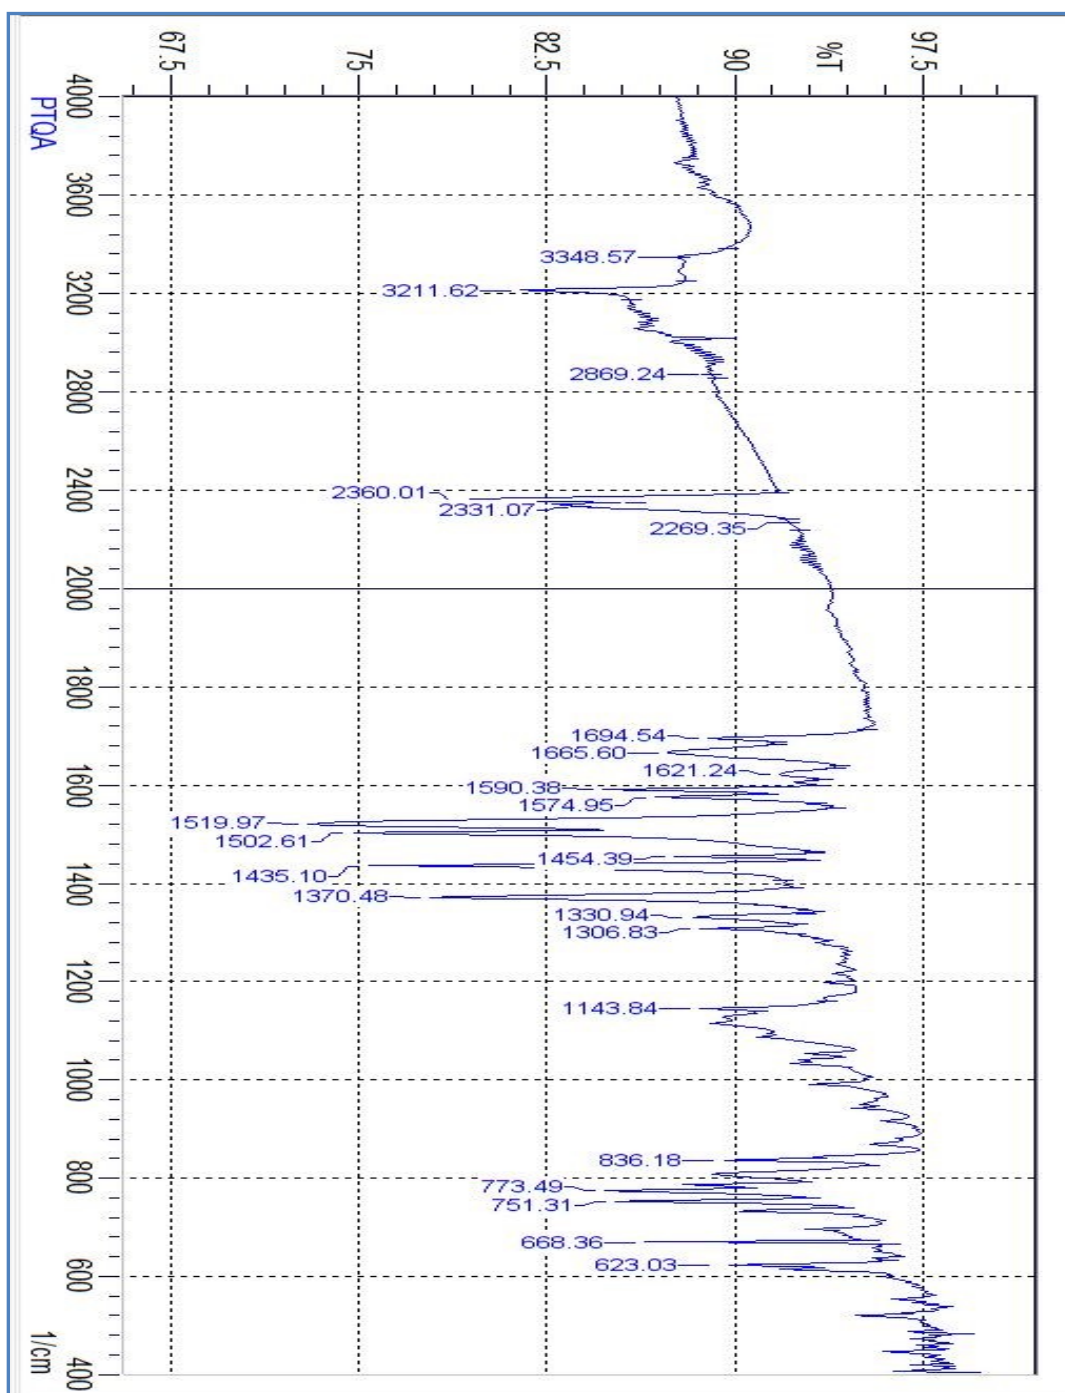

**Fig. 1** *SI*<sup>\*</sup>. FTIR spectrum of N-(pyridin-2-yl)-quinoline-2-carbothioamide (PTQA).

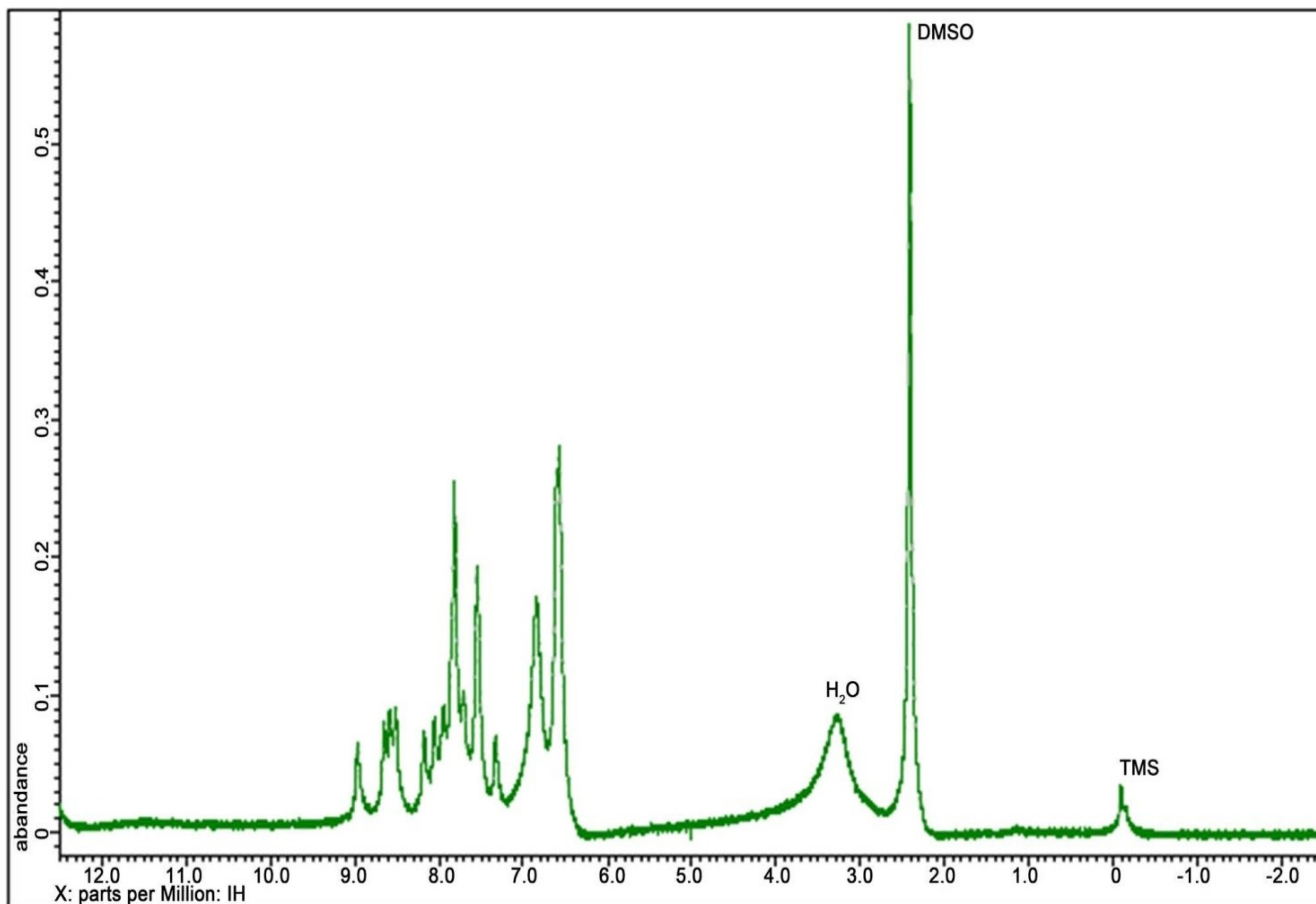

**Fig.2 S1\*.** <sup>1</sup>H NMR spectrum of N-(pyridin-2-yl)-quinoline-2-carbothioamide (PTQA)

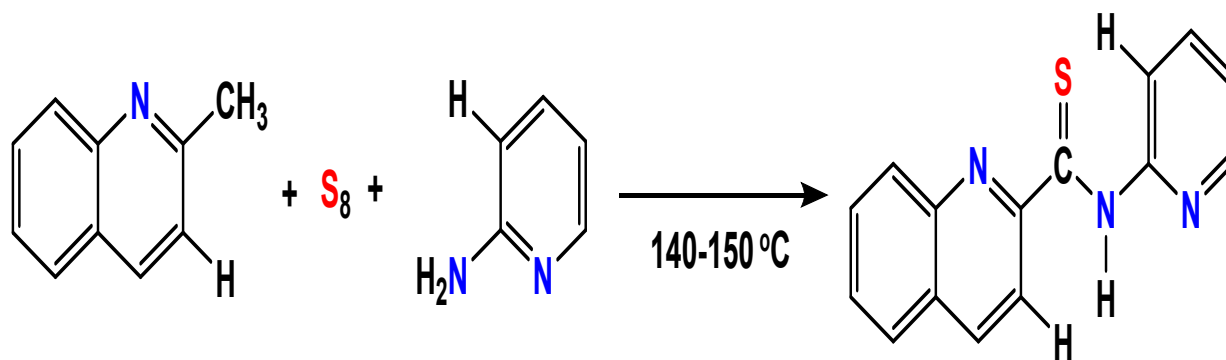

**Scheme 1 S1\*:** Structure of N-(pyridin-2-yl)-quinoline-2-carbothioamide (PTQA)

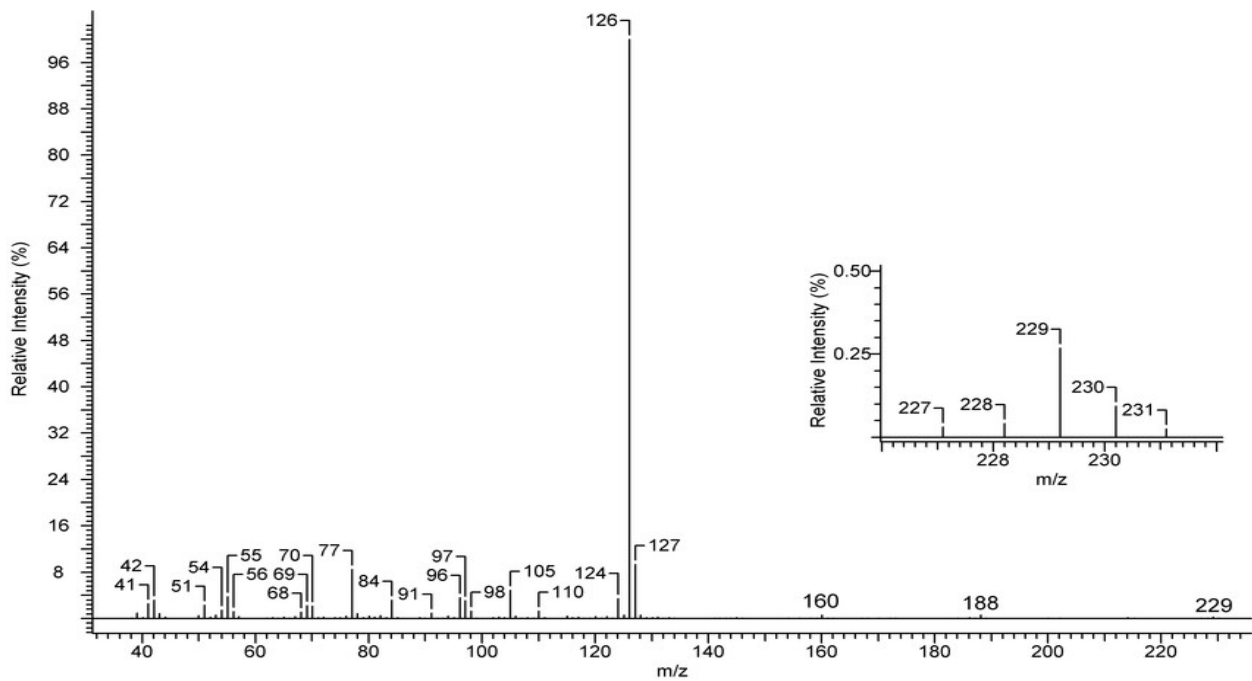

**Fig. 3 SI\*.** Mass spectrum of N-(pyridin-2-yl)-quinoline-2-carbothioamide (PTQA)

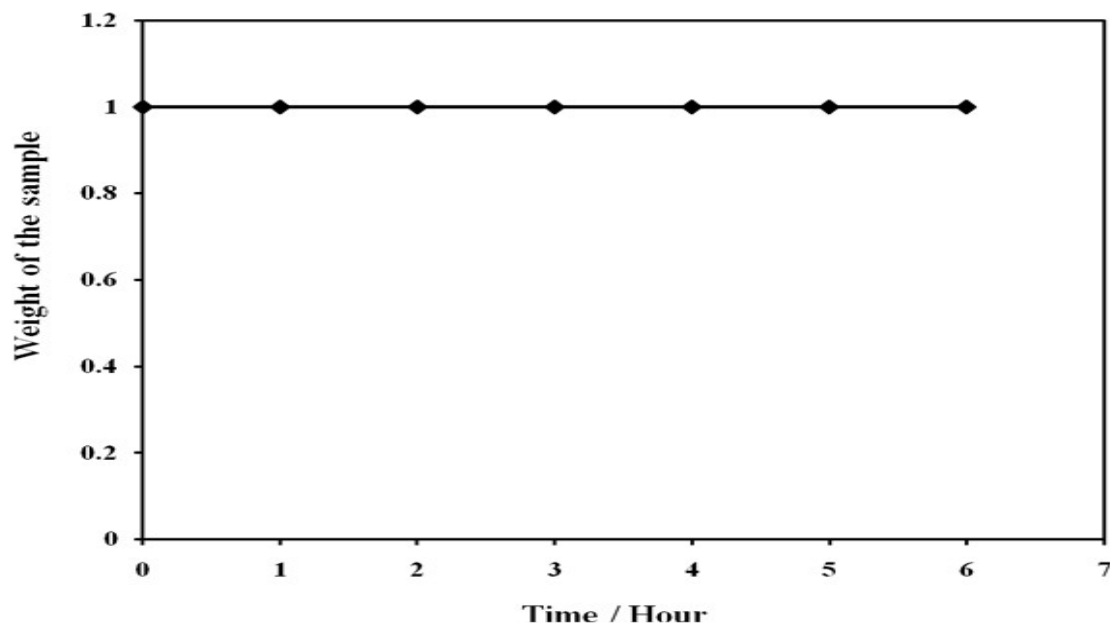

**Fig. 4 SI\*.** Thermo-gravimetric curve of N-(pyridin-2-yl)-quinoline-2-carbothioamide (PTQA) at 80-85°C.

# NMR Spectrum of Thallium(Tl)

Thallium (Tl) has two high sensitivity NMR active nuclei,  $^{203}\text{Tl}$  and  $^{205}\text{Tl}$ .  $^{205}\text{Tl}$  is more sensitive and yields less broad signals than  $^{203}\text{Tl}$  (Fig. 5 S1\*).  $^{205}\text{Tl}$  is therefore the preferred thallium nucleus. Both nuclei are spin-half and yield narrow signals in the absence of oxygen. Many thallium salts bind oxygen from the air which typically causes strong oxidizing capacity of other compound especially ligand by paramagnetic broadening of 10's of Hz. Thallium has a very wide chemical shift range (Fig. 2 S1\*).  $^{203}\text{Tl}$  (Fig. 2 S1\*) yields signals that are less sensitive and slightly broader than  $^{205}\text{Tl}$ . Therefore  $^{205}\text{Tl}$  NMR is the preferred thallium nucleus.

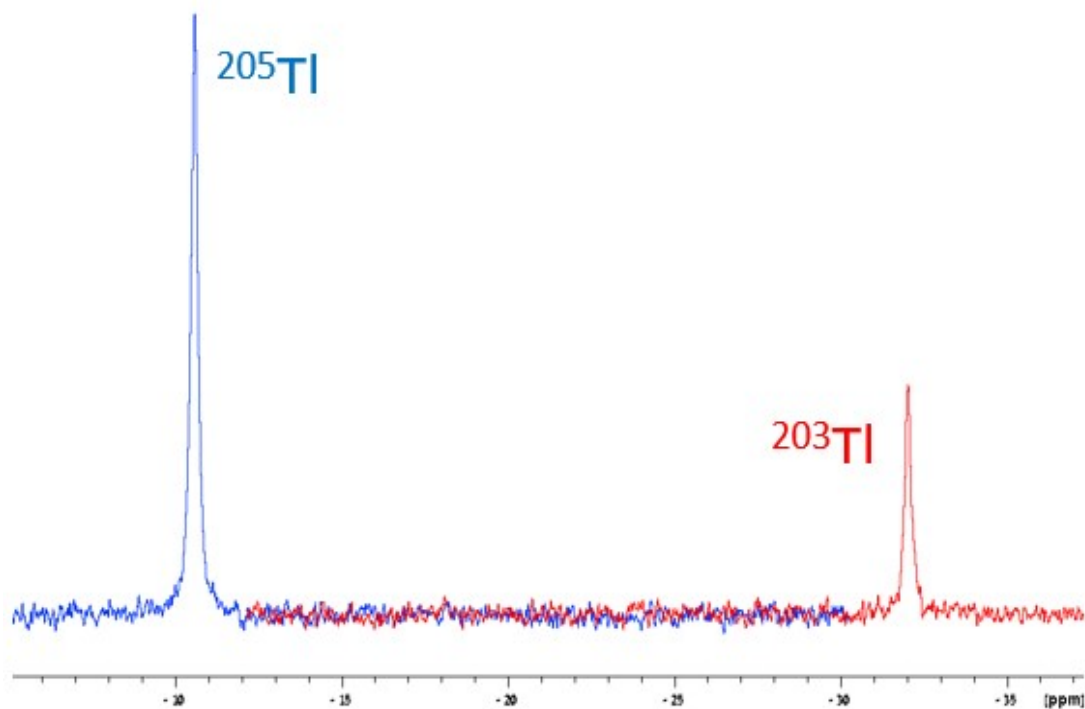

Fig. 5 S1\*. Comparison of  $^{203}\text{Tl}$  and  $^{205}\text{Tl}$  NMR for  $\text{TlNO}_3$  in  $\text{H}_2\text{O}$

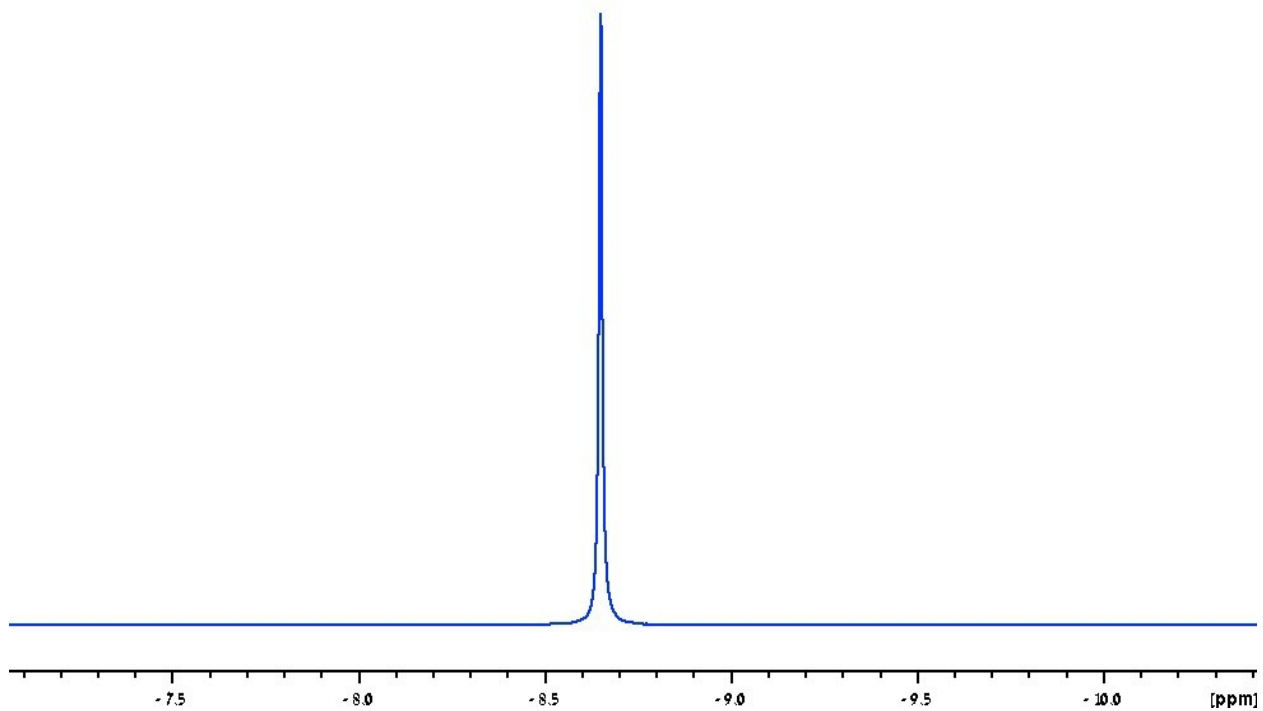

Fig. 6 SI\*.  $^{205}\text{Tl}$  NMR for  $\text{TlNO}_3$  in  $\text{H}_2\text{O}$

Source: J. Hinton, "Thallium NMR spectroscopy", *Bull. Magn. Reson*, 1992, **13**, 90-108.

URL: <http://chem.ch.huji.ac.il/nmr/techniques/1d/row6/tl.html>

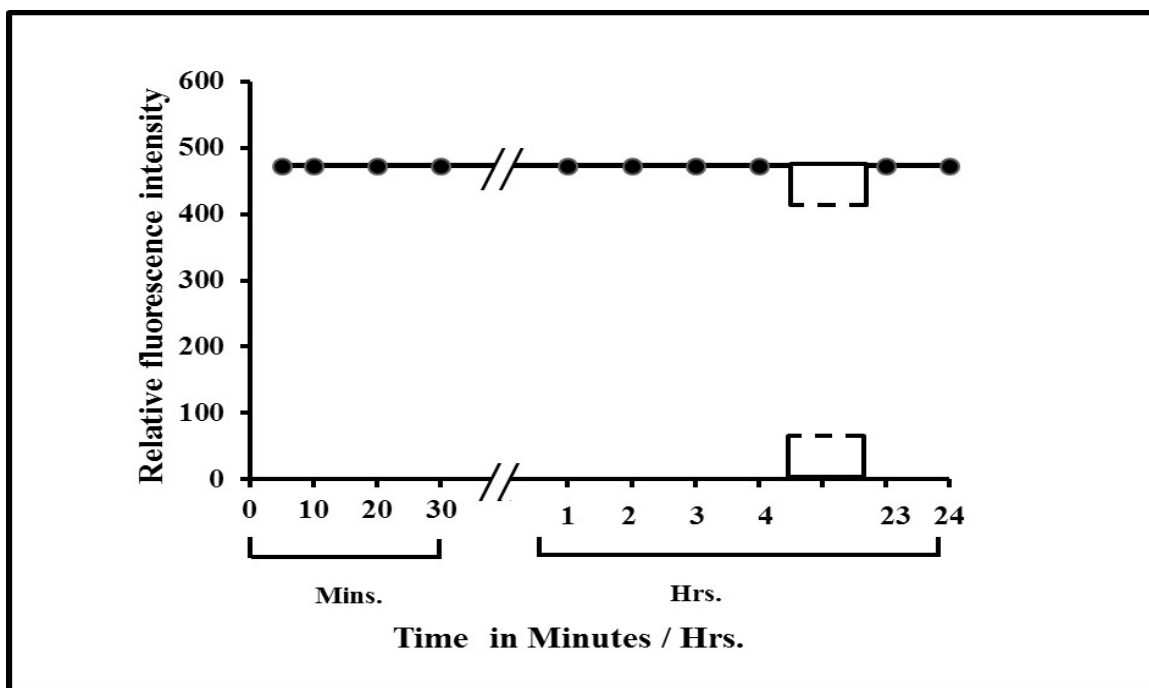

Fig. 7 SI\*. Effect of the time on the fluorescence of  $\text{Tl}^{\text{III}}$ -PTQA system.

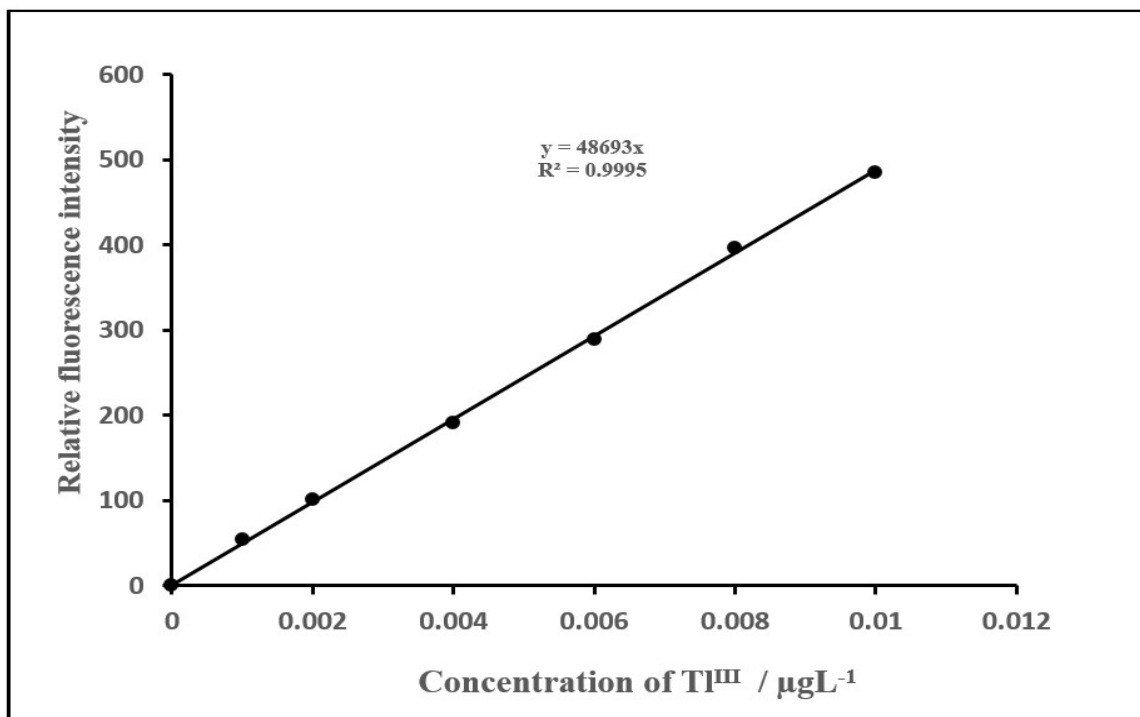

**Fig. 8 *SI*\***. Calibration graph A: 0.001-0.01- $\mu g L^{-1}$  of thallium<sup>III</sup>  
 Bandwidth: Ex.slit-3, Em.slit-5  
 Sensitivity: High

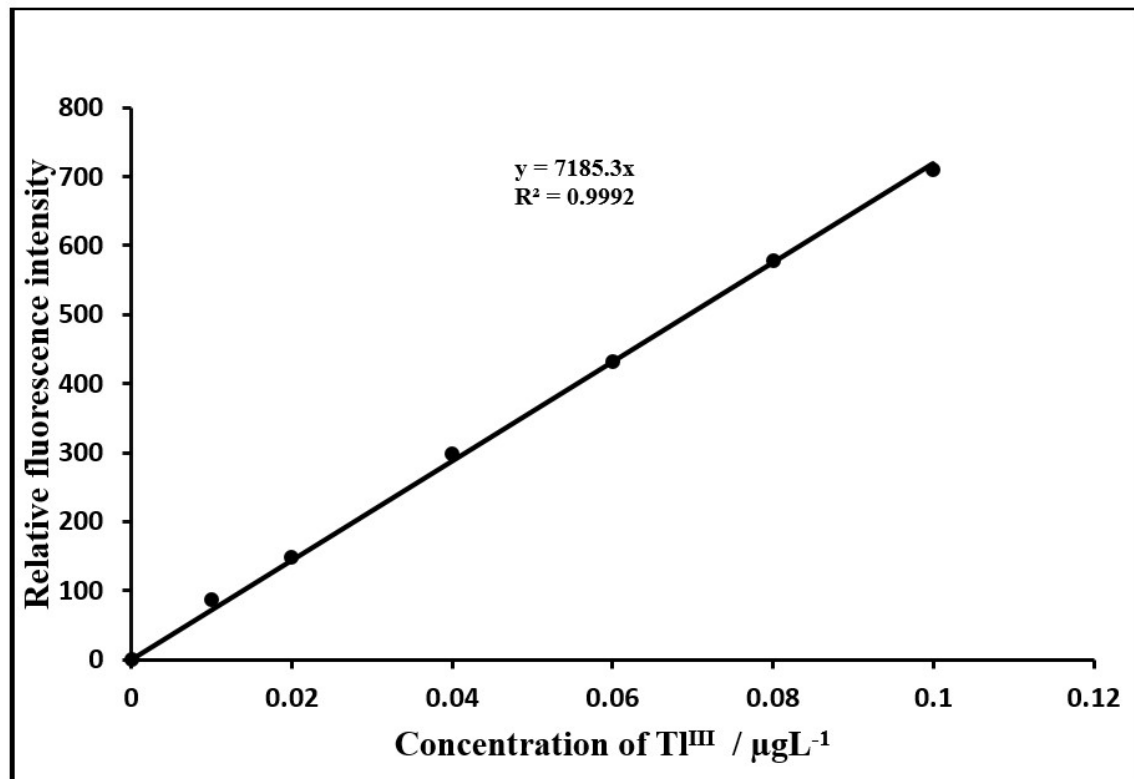

**Fig. 9 *SI*\***. Calibration graph B: 0.01- 0.1- $\mu g L^{-1}$  of thallium<sup>III</sup>  
 Bandwidth: Ex.slit-3, Em.slit-3  
 Sensitivity: High.

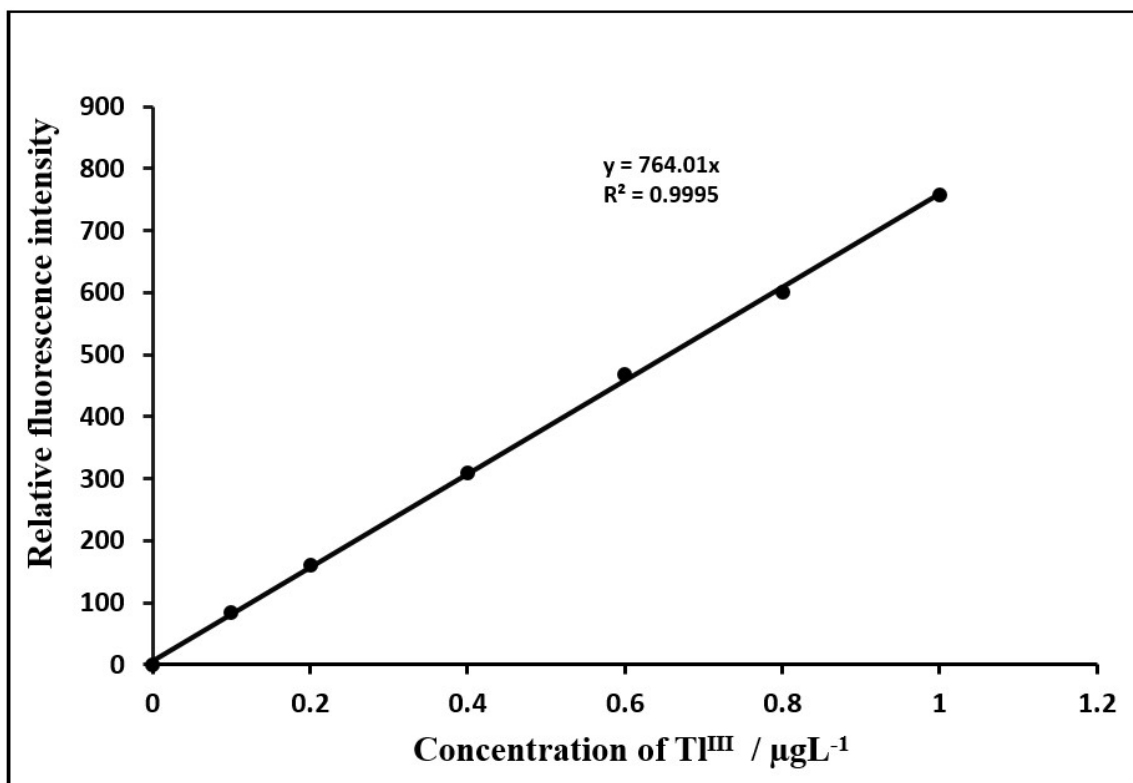

**Fig. 10 *SI*\***. Calibration graph C: 0.1 - 1-  $\mu gL^{-1}$  of thallium<sup>III</sup>  
Bandwidth: Ex.slit-5, Em.slit-1.5  
Sensitivity: High

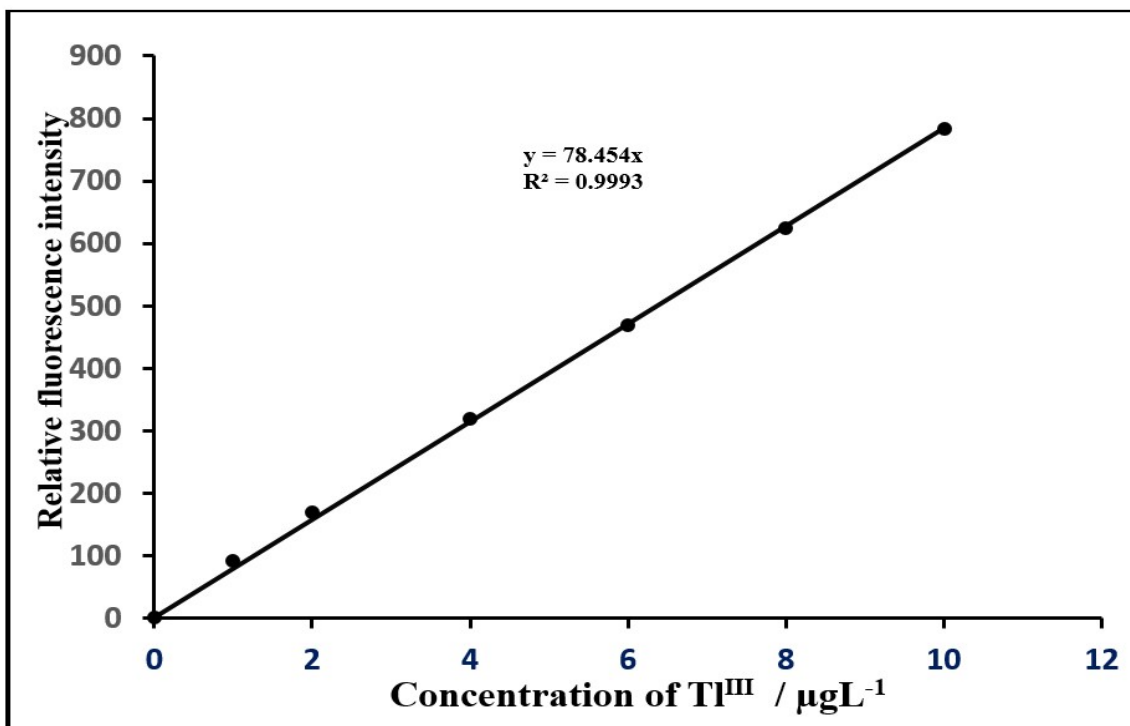

Fig. 11 *SI\**. Calibration graph D: 1-10-  $\mu\text{gL}^{-1}$  of thallium<sup>III</sup>  
 Bandwidth: Ex.slit-3, Em.slit-5  
 Sensitivity: High

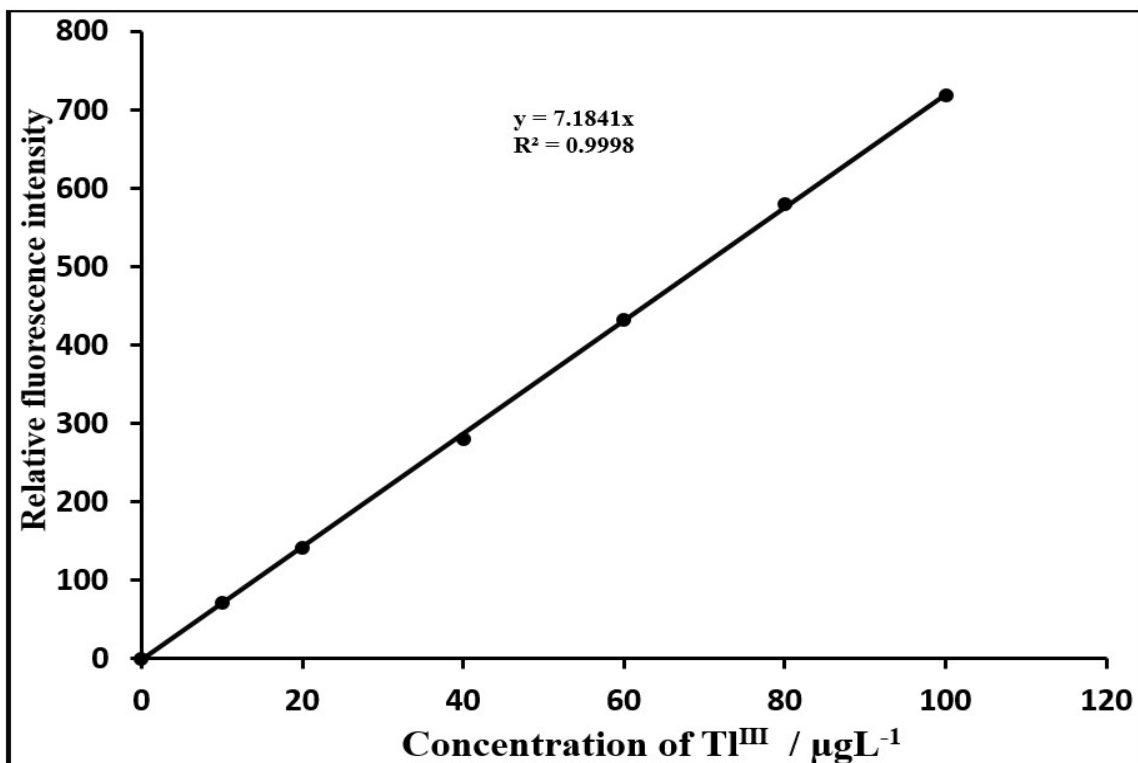

Fig.12 *SI\**. Calibration graph E: 10-100 -  $\mu\text{gL}^{-1}$  of thallium<sup>III</sup>  
 Bandwidth: Ex.slit-5, Em.slit-3  
 Sensitivity: High



**Table 1S1\*.**Table of tolerance limits of foreign ions<sup>a</sup>, tolerance ratio [species (x) / Tl(w/w)]

| Species x      | Tolerance Ratio<br>x/Tl (w/w) | Species x       | Tolerance Ratio<br>x/Tl (w/w) |
|----------------|-------------------------------|-----------------|-------------------------------|
| Aluminum       | 1000                          | Iron (III)      | 500 <sup>b</sup>              |
| Ammonium       | 1000                          | Lead (II)       | 1000                          |
| Azide          | 1000                          | Magnesium       | 1000                          |
| Arsenic (III)  | 1000                          | Manganese (II)  | 1000                          |
| Arsenic (V)    | 100 <sup>b</sup>              | Manganese (VII) | 300 <sup>c</sup>              |
| Ascorbic acid  | 1000                          | Mercury (II)    | 1000                          |
| Antimony       | 1000                          | Molybdenum (V)  | 100 <sup>c</sup>              |
| Barium         | 1000                          | Nitrate         | 1000                          |
| Bromide        | 1000                          | Nickel          | 1000                          |
| Bismuth (III)  | 1000                          | Oxalate         | 1000                          |
| Beryllium (II) | 1000                          | Potassium       | 1000                          |
| Calcium        | 1000                          | Selenium (IV)   | 100 <sup>c</sup>              |
| Chloride       | 1000                          | Selenium (VI)   | 1000                          |
| Cobalt (II)    | 1000                          | Silver          | 1000                          |
| Cobalt (III)   | 1000                          | Sodium          | 1000                          |
| Copper (I)     | 1000                          | Strontium       | 1000                          |
| Copper (II)    | 1000                          | Sulfate         | 1000                          |
| Chromium (III) | 1000                          | Tellurium (IV)  | 1000                          |
| Chromium (IV)  | 100 <sup>c</sup>              | Tellurium (VI)  | 1000                          |
| Cadmium        | 1000                          | Titanium (IV)   | 1000                          |
| Carbonate      | 1000                          | Tartrate        | 1000                          |
| Cesium         | 1000                          | Thallium (I)    | 500 <sup>b</sup>              |
| Citrate        | 1000                          | Thiocyanate     | 1000                          |
| Cerium (III)   | 1000                          | Thiourea        | 1000                          |
| Cerium (IV)    | 100 <sup>b</sup>              | Tungsten (VI)   | 1000                          |
| Cyanide        | 1000                          | Tin (II)        | 1000                          |
| EDTA           | 1000                          | Tin (IV)        | 1000                          |
| Fluoride       | 1000                          | Uranium (VI)    | 1000                          |
| Iodide         | 1000                          | Vanadium (V)    | 500 <sup>b</sup>              |
| Iron (II)      | 1000                          | Zinc            | 1000                          |

<sup>a</sup> Tolerance limit was defined as ratio that causes less than  $\pm 5$  percent interference.

<sup>b</sup>With 10 mgL<sup>-1</sup> tartrate.

<sup>c</sup>With 10 mgL<sup>-1</sup>EDTA.
